# Supplementary material for: Critical role for a promoter discriminator in RpoS control of virulence in Edwardsiella piscicida
Source: PLoS Pathog. 2018 Aug 31;14(8):e1007272. doi: 10.1371/journal.ppat.1007272 (PMC6136808; doi:10.1371/journal.ppat.1007272)
Supplement: S4 Table — (XLSX) [file ppat.1007272.s010.xlsx]

## Sheet: Sheet1
Table S4 List of genes repressed by RpoS according to RNA-seq analysis
Locus	Gene	Annotation	ΔrpoS/WT
ETAE_1967	-	HpcH/HpaI aldolase	∞
ETAE_2038	-	hypothetical protein	∞
ETAE_2588	sdhC	succinate dehydrogenase cytochrome b556 large membrane subunit	39.4
ETAE_2587	sdhD	succinate dehydrogenase cytochrome b556 small membrane subunit	32.3333
ETAE_1031	-	fimbrial chaperon protein	29.3333
ETAE_r001	-	16S ribosomal RNA	23.6667
ETAE_1703	-	oriC-binding nucleoid-associated protein	23.5
ETAE_1030	-	type 1 fimbrial protein	21
ETAE_1484	-	methionine-R-sulfoxide reductase	20.5556
ETAE_R025	-	16S ribosomal RNA	20.3333
ETAE_r021	-	16S ribosomal RNA	20
ETAE_r018	-	16S ribosomal RNA	19.6667
ETAE_2586	sdhA	succinate dehydrogenase catalytic subunit	19.25
ETAE_1660	-	Na+/proline symporter	18.3333
ETAE_r012	-	16S ribosomal RNA	18.3333
ETAE_r004	-	16S ribosomal RNA	18
ETAE_3379	dctA	C4-dicarboxylic acid, orotate and citrate transporter	17.6571
ETAE_1485	-	hypothetical protein	17.6471
ETAE_r007	-	16S ribosomal RNA	17.5
ETAE_r015	-	16S ribosomal RNA	14.75
ETAE_r024	-	23S ribosomal RNA	13.6667
ETAE_r014	-	23S ribosomal RNA	13.3333
ETAE_r020	-	23S ribosomal RNA	13.3333
ETAE_3516	rbsD	high-affinity D-ribose transport protein	12.0606
ETAE_r002	-	23S ribosomal RNA	12
ETAE_r008	-	23S ribosomal RNA	11.5
ETAE_1793	hemN1	coproporphyrinogen III oxidase	10.6667
ETAE_0331	lldP	L-lactate permease	10.6111
ETAE_3112	-	hypothetical protein	10.5
ETAE_2430	evpB	type VI secretion system protein EvpB	10.4388
ETAE_r011	-	23S ribosomal RNA	10.25
ETAE_0413	-	transmembrane transport protein	10.0455
ETAE_r017	-	23S ribosomal RNA	10
ETAE_0866	eseG	hypothetical protein	9.66667
ETAE_2428	evpP	type VI secretion system protein EvpP	9.53846
ETAE_3116	glpT	sn-glycerol-3-phosphate transporter	9.5
ETAE_1794	-	heme iron utilization protein	9.0625
ETAE_r005	-	23S ribosomal RNA	9
ETAE_0258	-	hypothetical protein	8.71429
ETAE_0135	gntK	gluconate kinase	8.54545
ETAE_1796	hemP	hemin uptake protein HemP	8.50625
ETAE_2429	-	hypothetical protein	8.39
ETAE_2568	-	hypothetical protein	8.33333
ETAE_1982	leuD2	3-isopropylmalate dehydratase small subunit	8
ETAE_2432	evpD	type VI secretion system protein EvpD	7.72727
ETAE_2431	evpC	type VI secretion system protein EvpC	7.4375
ETAE_0223	citX	2-(5''-triphosphoribosyl)-3'-dephosphocoenzyme-A synthase	7.42857
ETAE_0870	eseC	type III secretion system effector protein C	7.33333
ETAE_0871	escA	type III secretion low calcium response chaperone	7.29592
ETAE_0473	-	divalent heavy-metal cations transporter	7.16667
ETAE_0873	-	hypothetical protein	7.13115
ETAE_2326	-	AraC family transcriptional regulator	6.97872
ETAE_0872	eseB	EspA family secreted protein	6.74104
ETAE_0134	gntU	gluconate transporter, low affinity GNT 1 system	6.66667
ETAE_0867	escB	type III secretion system chaperone protein B	6.66667
ETAE_1217	-	hypothetical protein	6.5
ETAE_1933	-	phosphatidylserine decarboxylase	6.05263
ETAE_0869	eseD	type III secretion system effector protein D	6.02885
ETAE_0730	-	hypothetical protein	6
ETAE_1481	-	transferrin-binding protein A	5.875
ETAE_2977	-	dicarboxylate-binding periplasmic protein	5.63889
ETAE_3515	rbsA	ATP-binding protein	5.52
ETAE_1470	-	hypothetical protein	5.50962
ETAE_0614	-	ABC-type cobalamin/Fe3+-siderophores transport system, ATPase	5.4
ETAE_0868	eseE	type III secretion system effector protein E	5.39189
ETAE_1032	-	fimbrial usher protein	5.33333
ETAE_2114	-	Fe-S type, tartrate/fumarate subfamily hydro-lyase subunit beta	5.33333
ETAE_1072	-	hypothetical protein	5.29167
ETAE_2585	sdhB	succinate dehydrogenase iron-sulfur subunit	5.27273
ETAE_2188	-	hypothetical protein	5.17241
ETAE_2185	-	hypothetical protein	5.07692
ETAE_3469	aphA	acid phosphatase/phosphotransferase	5
ETAE_2569	gpmA	phosphoglyceromutase	4.93697
ETAE_3277	pckA	phosphoenolpyruvate carboxykinase	4.92727
ETAE_0188	acs	acyl-coenzyme A synthetase/AMP-(fatty) acid ligase	4.86111
ETAE_1797	hemR	hemin receptor	4.76923
ETAE_2509	cstA2	carbon starvation protein	4.71429
ETAE_1034	-	UDP-sugar hydrolase	4.7
ETAE_2186	-	thioredoxin (H-type,TRX-H)	4.66667
ETAE_0770	-	alcohol dehydrogenase	4.5
ETAE_2838	yehT	two-component response-regulatory protein	4.5
ETAE_2975	-	hypothetical protein	4.42857
ETAE_2976	-	hypothetical protein	4.40625
ETAE_1057	-	hypothetical protein	4.375
ETAE_0911	-	hemolysin	4.33333
ETAE_0156	pepE	peptidase E	4.30769
ETAE_0224	citF	citrate lyase subunit alpha/citrate-ACP transferase	4.3
ETAE_1757	-	hypothetical protein	4.28571
ETAE_0435	exuT	galacturonate transporter	4.25
ETAE_2534	agaW	PTS system, N-acetylgalactosamine-specific IIC	4.25
ETAE_2768	-	ABC transporter substrate-binding protein	4.05
ETAE_1336	flhD	transcriptional activator	4
ETAE_2589	gltA	type II citrate synthase	3.95098
ETAE_0386	mdh	malate/lactate dehydrogenase	3.94891
ETAE_3468	-	hypothetical protein	3.92308
ETAE_0247	sodC	copper-zinc superoxide dismutase	3.86415
ETAE_0910	-	hemolysin activator HlyB domain protein	3.83333
ETAE_1798	hemS	hemin transport protein	3.81818
ETAE_0311	aspA	aspartate ammonia-lyase	3.76316
ETAE_0210	malE	maltose ABC transporter periplasmic protein	3.75
ETAE_0928	-	N-acetylneuraminate lyase	3.75
ETAE_1915	-	hexuronate transporter	3.75
ETAE_3372	-	hypothetical protein	3.71429
ETAE_1357	-	hypothetical protein	3.7
ETAE_1048	dld	D-lactate dehydrogenase	3.66667
ETAE_1356	-	DNA-binding transcriptional activator	3.66667
ETAE_2533	-	PTS system, N-acetylgalactosamine-specific IID	3.66667
ETAE_2941	gcvT	glycine cleavage system aminomethyltransferase T	3.66667
ETAE_0330	-	hypothetical protein	3.65714
ETAE_2209	cspD	cold shock protein	3.63866
ETAE_0287	fucR	L-fucose operon activator	3.63636
ETAE_2187	-	membrane assocaited cytochrome c-type biogenesis protein	3.625
ETAE_3441	glpF	glycerol uptake facilitator protein	3.625
ETAE_1275	mgsA	methylglyoxal synthase	3.58824
ETAE_1522	tonB	transporter	3.57143
ETAE_0557	-	CoA binding domain/acetyltransferase domain-containing protein	3.5
ETAE_2769	-	ABC transporter permease	3.5
ETAE_2264	sdaB	L-serine dehydratase	3.44444
ETAE_3514	rbsC	ribose ABC transporter permease	3.44444
ETAE_1964	rpmJ	50S ribosomal protein L36	3.36
ETAE_0615	-	Fe3+-hydroxamate ABC transporter periplasmic protein	3.33333
ETAE_2433	evpE	type VI secretion system protein EvpE	3.33333
ETAE_2298	-	NLP/P60 protein	3.3057
ETAE_2707	-	hypothetical protein	3.3
ETAE_2050	-	isocitrate dehydrogenase, specific for NADP+	3.28261
ETAE_1986	-	hypothetical protein	3.27586
ETAE_1934	arcD	amino acid transporter	3.25
ETAE_0414	-	hypothetical protein	3.2381
ETAE_1158	-	hypothetical protein	3.16667
ETAE_3157	-	hypothetical protein	3.14286
ETAE_3377	-	sugar kinase, ribokinase family	3.14286
ETAE_3337	-	formate dehydrogenase-O, major subunit	3.03684
ETAE_0008	ibpA	molecular chaperone	3
ETAE_1239	ompF2	outer membrane porin F protein	2.98594
ETAE_3142	-	oxidoreductase molybdopterin binding protein	2.97297
ETAE_2490	-	GntR family transcriptional regulator	2.95349
ETAE_3442	glpK	glycerol kinase	2.94444
ETAE_2559	modA2	molybdate transporter periplasmic protein	2.94118
ETAE_0436	uxaC	glucuronate isomerase	2.93902
ETAE_2403	-	glutathione S-transferase	2.93478
ETAE_3547	-	hypothetical protein	2.91667
ETAE_0795	crl	DNA-binding transcriptional regulator	2.84615
ETAE_2764	-	hypothetical protein	2.83333
ETAE_0143	udp	uridine phosphorylase	2.78378
ETAE_0009	ibpB	molecular chaperone	2.75649
ETAE_0221	ybdS	citrate carrier/transporter	2.73684
ETAE_3452	cpxP2	periplasmic stress adaptor protein	2.71429
ETAE_1580	-	substrate-binding transport protein	2.69231
ETAE_1465	-	2-keto-4-pentenoate hydratase	2.67105
ETAE_2874	nlpD	outer membrane lipoprotein	2.6413
ETAE_0995	hupB	transcriptional regulator HU subunit beta	2.62143
ETAE_3357	-	carbohydrate uptake (CUT2 family) ABC transporter substrate-binding protein	2.61111
ETAE_2434	evpF	type VI secretion system protein EvpF	2.6
ETAE_2289	uxuA	mannonate dehydratase	2.58065
ETAE_1758	-	glucose-1-phosphatase/inositol phosphatase	2.52941
ETAE_0662	lpdA	dihydrolipoamide dehydrogenase	2.49655
ETAE_1823	-	hypothetical protein	2.48936
ETAE_2291	-	D-mannonate oxidoreductase	2.46154
ETAE_2635	gltL	glutamate-aspartate ABC transporter ATP-binding protein	2.42857
ETAE_1824	-	hypothetical protein	2.42723
ETAE_0886	-	two-component response regulator	2.4
ETAE_0728	-	flavodoxin	2.37931
ETAE_1467	-	filament protein	2.36919
ETAE_2130	-	flagellin associated protein	2.36364
ETAE_2911	-	diaminopimelate decarboxylase	2.36364
ETAE_1911	-	hypothetical protein	2.36
ETAE_0225	citE	citrate lyase subunit beta	2.33333
ETAE_1909	-	universal stress protein UP12	2.32576
ETAE_2263	sdaC	serine transporter	2.27586
ETAE_0084	kbl	2-amino-3-ketobutyrate coenzyme A ligase	2.275
ETAE_3188	dkgA	2,5-diketo-D-gluconate reductase A	2.26667
ETAE_0665	acnB	bifunctional aconitate hydratase 2/2-methylisocitrate dehydratase	2.25946
ETAE_2290	-	hypothetical protein	2.25
ETAE_0423	nrdD	anaerobic ribonucleoside triphosphate reductase	2.23009
ETAE_1859	tpx	thiol peroxidase	2.19619
ETAE_0006	tolB1	periplasmic component of the Tol biopolymer transport system	2.19048
ETAE_3312	glpD	glycerol-3-phosphate dehydrogenase	2.18182
ETAE_3303	malT	ATP-dependent transcriptional regulator MalT-like, LuxR family	2.17391
ETAE_1122	maeB	malic enzyme	2.17021
ETAE_0434	exuR	DNA-binding transcriptional repressor ExuR	2.16667
ETAE_0227	citC	citrate lyase synthetase	2.15385
ETAE_0193	icc	cyclic 3,5-adenosine monophosphate phosphodiesterase	2.14815
ETAE_1330	uhpA	two-component response regulator, hexose phosphate transport system regulatory protein	2.14286
ETAE_3181	ygeV	DNA-binding transcriptional regulator	2.125
ETAE_3352	yhiP	inner membrane transporter	2.125
ETAE_2940	gcvH	glycine cleavage system protein H	2.11538
ETAE_2309	glnQ	glutamine ABC transporter ATP-binding protein	2.10784
ETAE_1269	sulA	SOS cell division inhibitor	2.08889
ETAE_1454	mdtI	multidrug efflux system protein	2.08
ETAE_3017	-	hypothetical protein	2.07692
ETAE_0877	esaN	type III secretion system ATPase	2.02941
ETAE_0085	tdh	L-threonine 3-dehydrogenase	2
ETAE_0310	dcuA	anaerobic C4-dicarboxylate transporter DcuA	2
ETAE_1453	mdtJ	small multidrug resistance protein	2
ETAE_1521	-	YciL domain-containing protein	2
ETAE_1715	yhjA	cytochrome c peroxidase	2
ETAE_3444	emrD	multidrug resistance protein D	2
